# Supplementary material
Source: MDPI journal article supplement (https://www.mdpi.com/1999-4907/14/2/166)
Supplement: s1 [file s1 › Table S1.xlsx]

## Sheet: Total
%IncMSE
Variables	Composite Chronology	GM	MT	PP	LO	PO	NO
Temp1	-4.58850551971653	-2.67023798387352	-0.414382785860666	-3.67200454040904	0.708167878301741	-2.57703854409858	-1.94260299020879
Temp2	7.45076524203145	1.76656576809655	-2.07290095907345	-4.2053706785167	-3.46260296378608	-1.22279063990567	-4.42681849713498
Temp3	12.385659759406	3.71572924980062	-2.51154567567902	-1.18358141149431	1.01548719220161	-2.80205576559092	-2.14281093769918
Temp4	28.1646623930037	6.89167897694764	1.22391622261547	-2.12458390251536	-1.39592967521893	1.31662808888989	0.340172941167408
Temp5	38.5106308902436	-1.4421505152623	2.26457550458561	11.0494322924106	-2.7637713762476	-1.24183545930986	-3.17837347031992
Temp6	20.2958650935338	3.21909297278697	8.70460401552388	2.2807940948013	4.67744247705535	1.3761130640394	2.08223105747947
Temp7	25.2985168534657	-1.04166614772359	-3.87665751836934	-3.56036812821543	-2.45403609400661	-2.15251358352489	-5.96318227603306
Temp8	19.1054573313168	4.09187597870848	1.11621864330232	-1.98386074513235	-0.16477836908978	-1.9956645833087	-5.36729257448438
Temp9	21.0335927342358	-0.967669837592425	-2.30294082965897	-3.72436206224338	-1.15266350443168	-2.63266219969776	1.13283115074561
Temp10	17.0589585255718	9.45358528482488	-0.72294152443527	2.69332941772393	-2.75799733664954	-1.96610249727757	-1.6210890054395
Temp11	14.3764900314162	-1.06544076102409	-0.452724065985738	-3.32563330157037	-1.00029258670361	-1.06632173820042	-0.113611607384129
Temp12	-8.52267345826971	-1.7374028280474	-3.24829439808121	-0.0144834288732657	-6.61329810910621	-2.30110666600321	-1.84473058237221
TempMin1	10.4331482086524	-3.21084617736898	4.54740063218394	-3.44797728268801	2.43890188521467	-2.89447226764051	-2.7895518138964
TempMin2	24.7284409794871	1.58044907896373	0.616647161619938	-0.36356489852756	-3.00220120962823	3.34847143984188	-4.16077544801631
TempMin3	20.0699968222838	7.11768156621876	-2.10247188026073	1.27950803828247	2.64855246225016	-1.06575279664529	-4.64958123517667
TempMin4	35.3688354027503	3.97482504047468	-2.13647400802754	-2.54349593964516	-1.39465342443344	6.9519968622967	0.748453453195896
TempMin5	70.5451714675457	-4.68685955645095	3.12133170265569	13.9360187347651	-4.19644977696866	-3.13636318332539	-5.13227115650033
TempMin6	32.8279824150663	3.13500317495638	3.22172301228594	2.15290677632891	2.88143952801596	1.5176932444615	-0.644951928312714
TempMin7	51.9513641379086	-1.81508725271015	-3.78750148967283	-2.74224149558865	-2.65037121193335	-5.39612393435291	-6.91870138248585
TempMin8	41.8853331455038	0.214404390740667	-0.530833110696275	-1.26083899761868	-0.849668822288899	1.51817686611023	-4.62329938587029
TempMin9	30.7704215353902	0.207451516043857	-1.77652205431253	-2.66948709812301	-3.54672966306514	-2.92908881813146	-2.89918718234067
TempMin10	20.1874943764043	6.51982079172368	-1.71362950794775	5.471646131918	-1.84761137140751	-1.08927953649174	2.60103874256465
TempMin11	10.6696380428245	-0.385945361739311	0.837770038120476	-4.99141688604923	-4.50556931220557	-3.61100039877617	-2.70842238998887
TempMin12	-3.73395597163831	-0.211473496169629	-4.11857961021838	0.164419934078346	-5.15744566752397	-3.02783854914377	-2.99930215839872
TempMax1	-7.53335242397309	-2.97376540302512	-3.84733668120158	-1.11596550398447	-2.24649642258528	0.365624313073682	-2.76007860832226
TempMax2	1.56326259270429	4.81665198510526	-4.51049677964472	-2.24407498603289	-2.99947764260065	-2.8813100944144	-5.2251456516131
TempMax3	65.3432918238049	-2.13218660875032	-3.65164226685756	2.26890792700769	0.813162561027459	-2.29438078136333	-0.452861970254867
TempMax4	9.07455207873259	1.39581682587633	-2.08101442882475	1.43334672089388	-0.121518173032125	3.2352134826738	5.97542577775515
TempMax5	92.6749895215842	-3.6337960632479	2.2060890886815	11.9187516004701	-2.01695765354085	-2.78723079710513	-2.88339918322786
TempMax6	46.4995668267071	7.85231923595732	9.75226837300912	1.26396427015326	3.29800654243896	3.58400692837278	1.97428176242181
TempMax7	32.8533879165553	-2.05441391901649	-4.14513482337337	-4.39340417304315	-1.92144121554385	-2.38952626189375	-5.95341822533888
TempMax8	42.6103731469192	1.92032038716337	-1.02512158251679	-0.212760077091062	0.157122111818318	-2.87188341144648	-3.85177037128433
TempMax9	52.7487766192919	2.67105398753649	-3.25601716368151	-4.4352351790396	-0.885004109363733	-3.23280797901448	6.49858471651856
TempMax10	12.7882166577585	8.67176574074988	1.92098149073217	6.26668424774401	-1.4754739783728	-1.58472946817086	2.87346846238602
TempMax11	16.9670853428273	-1.81060807440301	-0.119560116866397	-0.0863032126218362	-0.975363844858503	-1.74563503630585	2.06710526750391
TempMax12	1.0321737749483	-4.68783112473342	-2.3160819512792	3.08919010892201	-4.96247983821175	-1.91823909577238	-3.44262887324755
TempPre1	0.977414871424735	-3.26653270931636	-1.68963354601183	-1.64438220743256	2.99317193786189	4.27337021442065	4.65432547430074
TempPre2	3.35706899091563	-2.81478691101441	-1.3994939737226	-3.78853629175259	-0.385667718620327	-3.57030273269516	11.2218551608084
TempPre3	23.1272210792529	0.69904273090846	-2.25465853616462	3.54879321176565	4.7861808851981	-4.11918621371992	-4.26742187263472
TempPre4	32.2775471706315	0.44227599270449	-6.0729807925886	-4.84974058327485	-2.9811971592222	-1.52760125913411	-2.67942661858775
TempPre5	18.0359102195609	-0.832628106587755	-0.699693509192484	-0.852923290074346	2.02802853866527	-1.91345595380264	4.2538616525435
TempPre6	52.1888123295982	2.65384387282981	-4.97036169575181	7.73883877313507	-0.902850001931436	-2.43802658729793	11.1287954984511
TempPre7	9.90591148927285	0.499784242813671	-4.49853316559421	-1.2050770696471	0.101958564123643	-2.76515965204892	-3.49900660089444
TempPre8	14.0047235965207	0.109590467758911	-2.31664620965079	-0.309352770857806	-5.16719443714305	0.381764185611999	-5.69080865369075
TempPre9	30.24173800499	-1.74860325324567	-2.49147307011172	-4.34374819301541	1.40163822943198	4.2239889910733	5.12142868396161
TempPre10	42.5352350506062	-1.58453676306045	1.21050179628913	5.55711539693158	2.31016349366795	17.7838885206799	-0.722575345216522
TempPre11	11.0055296212782	-2.19571086299513	5.0521725809648	-4.64359182390458	4.20934560738834	-0.173954405068621	-3.76964045120802
TempPre12	16.9976252466125	-3.10235068970508	-1.74111493814729	0.470789192205937	2.86990141276527	0.489715904777036	-0.0136717477739043
TempMinPre1	16.9753651026511	-2.94706834824507	1.74844452483556	-2.59013641880016	-0.641458607770658	1.36530603315519	0.100802658767733
TempMinPre2	6.31520611109188	-2.68908132980369	-3.6576962054684	-4.78007574093113	-3.59753995534993	-1.29391696774859	10.9148648737397
TempMinPre3	17.0346813839425	2.81299340540393	-1.92362190425147	-0.8088112615295	4.33656387455964	-4.16162030856941	-3.70402916568532
TempMinPre4	35.2508131719264	0.826581613911634	-4.47964188596015	-2.60281804980926	-5.69114078717901	-1.56622038107315	-0.562833350457965
TempMinPre5	15.3363081705846	-4.14878423646351	-1.41677927833681	2.21521307186739	5.10100684610008	0.527008736402189	2.22772715560538
TempMinPre6	52.9490562051938	4.29847797912321	-3.49963539345833	10.0234287444261	1.56195404165798	-1.37996872195312	10.0193763596396
TempMinPre7	27.5898024713711	3.14096856542185	-2.4407099119996	-2.6796907054983	0.416499770507357	7.60523512404238	-1.85022694309979
TempMinPre8	56.5836374097556	-1.16940426115193	-3.06180024758014	-0.805475174013631	-4.67749294961671	-2.48858645466005	-2.48519431620451
TempMinPre9	52.9393752653614	-2.22756377448444	-0.248634681062985	-5.43790470523786	3.47156840686999	1.04807026309674	6.93587081880626
TempMinPre10	57.6990346723748	-1.99366614166742	0.398314784501561	4.61182028146324	2.55524270689535	18.828801798939	0.79910751179408
TempMinPre11	19.1685242555685	-3.30652027051291	9.842134534739	-2.79427431061309	1.18149972375007	-1.39829196860242	-3.12806671970732
TempMinPre12	18.7451661151398	-1.8408910691063	-0.496785448504811	-2.14120285603783	9.75257762138253	2.93985994251635	-2.31902941580229
TempMaxPre1	-6.00985062141476	1.7779008571702	1.90580148579877	-3.69979161095839	-1.44775700767467	1.1522757995662	1.79189255585538
TempMaxPre2	5.97705225258479	-3.41146548308091	-2.71184148012615	-2.31302403879044	-0.0642575928352824	-3.20037719417579	12.8767665355576
TempMaxPre3	21.0644525676179	0.766185368452126	-3.02148358837501	-0.243430925924943	-3.74820606849014	-2.22196876411999	-1.25139847748193
TempMaxPre4	23.2371385636007	0.550001579188106	-3.06783762466814	-5.32785245831143	-3.75500913777595	-2.01232745224647	-2.24935437395189
TempMaxPre5	56.9084472938307	-1.96291227680094	1.79070212768146	0.213251622570529	-0.131305841151138	-0.932270997137725	0.274259642637684
TempMaxPre6	103.798149014181	8.517856024518	-3.13792647615205	5.21632289250582	1.75182138297067	-1.78643512254784	8.31109284585122
TempMaxPre7	23.4958136955183	2.21454583680121	-2.86067977992092	-1.813476288178	0.343700016810911	-3.939078848138	-3.00882701026242
TempMaxPre8	48.0487475423394	-2.97272177912683	-1.43331262504469	1.71204916451301	10.1874996751953	-4.7028591374338	-4.62650633367879
TempMaxPre9	52.7717951452995	-4.3564247648813	-1.59048404733909	-3.1774818303043	1.1953833092818	9.54090607657115	4.99499588125631
TempMaxPre10	48.4152658094369	-3.10921536096272	3.85413685611582	7.44059312157498	0.499187645375227	16.1653989255384	2.37860478132839
TempMaxPre11	21.8125405080459	-2.84027293072014	4.82663571090353	-3.04889498966523	3.98694815654473	-2.25182453278609	-1.26543061813464
TempMaxPre12	11.066376673171	-3.75950242033712	0.823532391884906	-0.842017127303646	3.23145186504654	-0.0702752185621002	0.316677039248039
Prec1	5.90715992458184	-0.596359322751633	14.8293316604961	2.26665803061726	-4.43332175573871	-3.70118944876567	-3.38622901853933
Prec2	0.264265295917026	-2.84775240496061	-2.99882018181466	-2.65713145010407	4.50624149708742	-2.49281952150161	3.55455386875573
Prec3	7.49453660103267	2.53211086273951	-2.21877697573343	-1.89164747582452	-3.01999485640202	-1.75774168127267	4.00413526239889
Prec4	3.09120806501291	-1.88111860554101	4.61862155366041	-2.20712465050454	-2.55552130253178	-1.32897329701429	-3.12779830628851
Prec5	-3.79196131508388	1.22677567685414	-1.82904308941764	-4.66848498539554	2.9343191195955	-2.22289997877589	-4.83589544168376
Prec6	3.16189350191052	2.11743220063618	0.85785320682376	-0.244290063530286	-2.64184376630389	-3.95779643078558	-0.763494484870928
Prec7	8.68698161380841	4.19571896177748	-4.2465930808783	-3.15755434417707	-1.89733218140695	-3.26665845867969	1.31641167127303
Prec8	10.5268198655342	-1.96472866211488	-1.29747597353456	3.4397324572636	-2.8515742646515	5.93237764637223	1.00105368598822
Prec9	19.0500346529456	-2.60436273029548	-1.53000610036898	0.580932029710202	-0.604160323289109	7.23943589798714	-6.78738936157567
Prec10	-7.18845765290087	-1.83318444909104	-1.41625993699525	-2.28081017036869	-2.30669157501661	-2.87199101723366	-2.53746869822242
Prec11	1.99426218156263	-0.492194443876091	-4.84791242952716	-3.32535919181491	2.41469271913345	-0.216755648306149	-3.55994584234257
Prec12	-4.47854617590667	-3.55802473807386	-3.84663957761861	-4.65957809797016	-0.962788353837018	-1.52019727034793	1.01786310995782
PrecPre1	0.535001074814929	-5.4957072470387	3.66798335993541	3.2006640324759	-4.18304141405808	-7.26915387460894	2.07769931517316
PrecPre2	3.7679775848164	1.5709920885349	0.122079621954961	-5.28985376713996	-1.81210891318687	-6.27644697192008	8.641589913868
PrecPre3	7.4190603485953	-1.08793377600002	-4.51673373457034	2.81204949215096	-4.14244052054881	-0.948471904156481	-5.54606818990473
PrecPre4	18.3207799181665	-4.05635177351509	-1.7519973163926	-7.90180567890295	3.4134189207861	-3.63193042879168	-2.04860632094475
PrecPre5	-1.4674457841388	-2.7087663074198	-0.00385630650471613	7.03647385800602	7.13006209858191	5.88084610849659	3.25551254100057
PrecPre6	4.02686484790484	-3.11777101256438	-4.85396085901136	-4.71052957528792	-1.19430568518015	2.6040581406125	-3.47464787865798
PrecPre7	0.685235953845018	-2.93332704405454	-6.13347899245508	-1.02963807204653	-1.439831116097	-0.341046606667822	0.75908425630639
PrecPre8	-1.48755558092791	-0.388814556408278	4.9407134621435	-2.4222784589015	0.716040042317742	3.77536103302918	-1.70195233457045
PrecPre9	1.91010997731043	3.47075954407887	-1.52895361824354	-2.37866661284775	0.0853577954976418	-2.69148556161571	0.674945694889311
PrecPre10	-13.7353309611347	-4.27176223632105	-3.83683899660829	-5.45570659913677	2.15187912755875	8.95075052092568	-7.99833339346432
PrecPre11	14.7259449272725	-3.29399659148865	0.620898470122739	-4.36367105062479	-1.04156425949073	-3.93881875578077	-1.20580477458675
PrecPre12	5.76957559932324	-0.489703877649834	-0.29385174783937	-4.2677620631733	2.61647699999283	0.190928378535955	-0.806300851545295

## Sheet: Current
%IncMSE
Variables	Composite chronology	GM	MT	PP	LO	PO	NO
Temp1	4.35382558661542	-4.78137803728674	-3.1631370551867	-3.06318105797474	1.79219265950345	-2.51321624786176	-2.43853486550688
Temp2	10.6720403331548	2.21907387242185	-3.25447712439238	-4.34099012828642	-3.60972545196124	-2.85442315105183	-7.16636581833626
Temp3	6.27222532495353	4.42227155340255	-1.51733564491769	-1.02341981741778	2.29270638046355	-3.37862642635087	-2.25404240634183
Temp4	15.003437453977	8.50452470871345	2.1577516872973	-2.66534250513664	-5.19275495850066	7.26602884789437	2.60683438045485
Temp5	15.7229033256249	-6.16864349175503	-0.227234038936876	13.165774090101	-1.58849237831062	-0.251802766607708	-5.61418913098651
Temp6	10.3385324929015	4.24708713451075	13.9514126480208	1.68165744061659	8.46013598859086	3.77069632899274	2.73041813636396
Temp7	9.18764709641317	-1.34933811935123	-6.64216400919795	-7.88270693016897	-3.13907753782674	-2.85849134382643	-5.26442837078076
Temp8	8.9762207477409	3.83532737002527	1.83104647482563	-3.16856799573889	-4.23738756540657	-4.79391047105252	-10.4500047653745
Temp9	4.96622242930139	-1.60596626774126	-0.796779654449769	-7.60520203136986	-2.69241002309544	-3.48279258547763	4.19774802547091
Temp10	8.96627087060546	13.8415877873021	2.28169837482852	5.29973128387652	-0.547112283065369	-4.91798453778809	0.851515706238526
Temp11	7.10945468497793	1.1147866872955	0.550193443492156	-3.1345833370079	-3.1038267745948	-2.91273467862295	0.718151001079026
Temp12	6.89032384524703	-1.45172289134111	-3.18093655917938	2.84000263681671	-8.01853244543304	-3.67590270026546	-2.09635315643928
TempMin1	10.3000049948	-3.22614170081676	6.43525719234845	-0.579695912397893	2.4379223845289	-2.88342118515319	-4.46314928955531
TempMin2	20.0444910496326	2.2219792370697	-0.609814397238439	0.155317047527403	-4.3339801677999	2.08975071711503	-7.74407153611349
TempMin3	13.7678960771032	10.1056674590803	-1.32423376712932	0.828819540278852	2.58863107400984	0.33380459987385	-4.51555058303438
TempMin4	20.343319856988	6.86935056154176	1.66351730806794	-3.27250221546093	-1.04340076855741	5.91762444231899	5.84539245908567
TempMin5	20.1693308860443	-3.84021322397637	4.75826611427741	17.6404812254158	-5.63973836761503	-3.4332081893964	-8.50129233989836
TempMin6	17.2433253398733	4.03863590714873	7.30157226741381	2.99745627518925	2.92020538009398	3.77452075518666	-0.495023835411775
TempMin7	24.1884500489239	-1.60135660140208	-6.57943217178154	-9.33732739858256	-5.60087649150616	-8.55028871403527	-7.36242848513657
TempMin8	23.3739326560024	-1.23865218698062	0.964095833193655	-3.30387910554345	1.42115671816799	-0.994829521749669	-4.92588515469213
TempMin9	14.6571288921318	1.75680166404725	-0.769803653551193	-5.7006894954786	-4.64051923875891	-3.93424994769224	-4.06344843902455
TempMin10	14.6454200994993	10.6257705921468	1.22294527288008	9.45992102663956	-1.689027110403	-3.23070738825376	3.63430346699001
TempMin11	11.2858804188382	0.420643826129062	-1.41940653991911	-5.27709492331452	-7.38811749457485	-2.4416679303569	-1.82465793368405
TempMin12	8.57876846079297	2.45888262764477	-7.50912024292322	2.97843745203786	-9.87821208681142	-5.72889570334711	-3.80285684169196
TempMax1	0.0414942806169982	-4.89082371748292	-4.46492420635557	-0.862105146727136	-2.34521746714156	0.0937258801026457	-2.68316730043479
TempMax2	6.92155675304306	4.37096328281799	-6.57159361395185	-1.3028102670412	-4.13454595966382	-4.46939941938436	-8.55033378644903
TempMax3	21.6798948254286	-1.02136059448301	-4.95110194635524	2.95391262566171	3.60836197407608	-3.99511965683942	1.43427174084005
TempMax4	9.09403565731336	2.59975789776455	-0.932612892758451	-0.350905678595368	-1.70058461641549	5.67854931171963	9.27967653691454
TempMax5	32.2062726460588	-4.87595511476164	1.19253415087651	13.7365266173429	-1.45229716619971	-1.6383504870776	-2.2204316068287
TempMax6	22.0863338561443	10.5216733882762	14.8250766498544	1.44284303909123	3.77672177810159	3.38699350362083	4.24808153288629
TempMax7	18.7214223318608	-2.74174462707351	-7.86149241454472	-6.62468948330356	0.394740150536189	-3.07740010201361	-6.33275902906523
TempMax8	25.1246929504795	0.314673733219407	1.77395771641348	-2.47990396983707	-0.586535057250525	-5.50819786187039	-6.13111274758905
TempMax9	20.8959951425914	1.79697903306288	-2.67226624683626	-7.8450795158349	-3.10031984299212	-6.58190090070546	9.4825672675442
TempMax10	9.75225367770867	9.57795296104244	6.02992334288383	9.56407337319762	-0.289547464656562	-3.56883854010733	4.12203832020184
TempMax11	9.40746842356986	-1.48016294784644	-2.85599603062967	2.67177939288333	-2.3275633758535	-3.18557665251865	2.61533820692202
TempMax12	5.27263480034204	-4.16373461098632	-2.4205819601685	4.09276031420296	-7.07042149019121	-3.37243108710296	-0.238771489771504
Prec1	1.14863427005441	1.27398935815398	16.930341671135	0.843212682049281	-6.05416630577703	-4.58321467183757	-2.89452750024086
Prec2	3.25990506604829	-6.52814850099495	-2.27881689629116	-5.28261866055524	3.26461294339827	-3.98771508748167	2.40366666994927
Prec3	3.30792332954795	1.55760630490402	-2.38048705113525	-1.43471648052273	-5.72724143078373	-3.00377499656494	2.63081398552941
Prec4	1.95813723295195	0.0403093130694926	3.2494174821797	-5.05674040409203	-5.36832444187291	-3.05888382967645	-3.55104111876712
Prec5	-6.59073570537453	2.12575414561118	-4.05892892150538	-4.97203358452338	3.20551572269994	-2.87304844469103	-3.77159201142508
Prec6	0.0127478030762444	0.256695017413972	-1.60277399605434	0.644632573149903	-1.92359689418258	-3.4762469342373	-3.7514927785816
Prec7	5.90256156979989	5.99283864169355	-5.20845673629005	-2.78856183265484	-3.98640474784111	-4.7106085593224	-1.16957328122084
Prec8	5.71742777698709	-4.18747578393413	0.071751094719593	2.46054008867779	-3.9509643815488	8.37925592105945	-5.27961709611443
Prec9	5.72842918545635	-5.94820544281446	-2.19587770226353	0.570854541724366	2.48302499678526	6.48355295768344	-8.70180537692068
Prec10	-3.85600076198071	-0.132945798800353	-2.55933895279021	-0.687916892225558	0.573217685068563	-2.47455794753245	-5.24345794575261
Prec11	-1.56209975952757	0.898146823875674	-5.9171473447731	-0.210050903098025	4.01129858312011	-3.78644990346108	-3.63567563869184
Prec12	-2.29515413744291	-4.35052314403387	-4.2596715469032	-9.53499970238575	1.31469755326467	1.05709414544252	2.69321339469407

## Sheet: Previous
%IncMSE
Variables	Composite chronology	GM	MT	PP	LO	PO	NO
TempPre1	4.76703048551784	-2.23427403199337	0.75053363118894	-2.34259647895565	1.83527421089383	5.04637701250966	1.88815913472194
TempPre2	5.34481008692907	-2.0638064356616	-4.60840221656164	-2.7329384131769	-0.830791254207443	-5.76269784009237	15.4098764515001
TempPre3	12.9209418435257	4.91767499806525	-0.419700281143673	4.90650172578551	5.96263324143814	-5.44011732142725	-7.29132390678792
TempPre4	12.2347851410201	0.738103284869402	-3.40768155714107	-7.02515391321197	-2.29577422053452	-0.71986424367036	-2.51423663424526
TempPre5	12.5862800560869	2.05112019993467	-1.07992279431933	2.24564318755915	-0.425551012355718	-2.05527445778976	5.80862392228132
TempPre6	12.4996743710066	5.46624144767469	-2.33520983852638	7.99254624419877	-0.770104804113094	-4.96660111613208	12.3104911416041
TempPre7	5.27274277862995	-0.379072916477573	-1.98906289005112	0.595880712671531	3.701179441433	-2.38062453255173	-5.83701264285302
TempPre8	8.90370435643525	-2.00114634783952	-3.40937910814215	2.26839752938157	-3.74054167444481	-0.82195452830887	-3.19444791948178
TempPre9	13.6526632563513	-6.89976934278043	-0.715476203152974	-4.84135827864032	2.42285875941231	2.81482976336773	7.96684201916669
TempPre10	21.7668998634295	-2.26194316646744	1.83210211221653	10.5398257719697	1.6312091378445	22.0968678118141	2.4124719825401
TempPre11	6.9496773237983	-3.84642703083791	7.05005009201319	-2.0530180717327	4.41969476946099	-2.39391844155396	-3.54963343692397
TempPre12	9.53243149984202	-5.40831430001021	-1.86450453982664	0.116069758256142	3.41456949191733	-0.958223456129272	-2.84946427007901
TempMinPre1	11.2080586874112	-1.32703664479749	1.66326035537292	0.620682994251208	-0.255602867469614	2.17363926725341	4.61586982887231
TempMinPre2	7.3757598963727	-0.770237137448785	-3.68000433034176	-4.37934936605236	-4.16664766365722	-2.70747417578155	13.8018308992527
TempMinPre3	13.607565391542	6.09272879795579	-3.03795180298507	2.01524623520975	8.53655417664821	-3.35388335372994	-6.42079157289167
TempMinPre4	13.3784935513387	-0.614050161356765	-4.53372501856859	-5.12548115384078	-5.09307396639949	-3.34675855216075	-0.851572926663051
TempMinPre5	9.68389492399552	-2.76108619994826	-1.35705551860307	1.64923921497389	7.52156095135808	-2.89024958836232	3.04420885280599
TempMinPre6	19.0303285468977	6.62499933544734	-2.51810645179296	12.3158114416462	-1.526557388708	0.682865390984267	13.379044160642
TempMinPre7	15.8690235655337	0.290591140851236	-0.622712954344794	-3.16356795201558	3.51836559999187	12.7213988289757	-1.80243754169855
TempMinPre8	20.7695536194152	-1.52822172093258	-1.55896568766721	-2.10201500877076	-2.90575623891305	-6.35552836421802	-4.08343659632753
TempMinPre9	19.8250076128515	-4.78687863040683	3.33269128448081	-6.16308959592544	1.37251776868217	1.1804257029318	10.6119523337221
TempMinPre10	23.9562432372118	-2.63799820079698	0.0364402161099031	10.7288983901445	3.05731701765819	23.5552487790019	2.28937447656288
TempMinPre11	10.7700993002407	-4.24310672871699	12.6233631470022	-3.26450972777376	3.15519974827975	0.000979011004758687	-2.57434687162331
TempMinPre12	10.2442387371534	-6.61537894659047	-1.95657102619167	-0.956474403512566	12.6750300080915	2.12170220824894	-5.14847786872144
TempMaxPre1	0.428935570922822	2.35589956673247	5.22838384057467	-2.67626103784318	0.00388335909040556	2.81793555535603	5.9665027980996
TempMaxPre2	6.59933289877636	-2.5828130542247	-6.53224175209399	-3.24696880256123	1.36317943479828	-4.4874102702238	13.5054370374041
TempMaxPre3	13.4233962548091	-1.42803071376977	-3.07935834112757	-1.02259977465838	1.21801061997882	-1.79623406016539	-8.28272676774126
TempMaxPre4	9.54109491227694	-1.51262301542287	-5.58733999330314	-6.59669652424284	-1.20509590210367	-3.23764444406102	-0.834649691874928
TempMaxPre5	21.3553874925222	-2.91887142239991	1.01550682673105	1.26792893283787	-1.66602420575456	-3.91049103735637	1.7396240143254
TempMaxPre6	33.1492717900725	12.7259496190432	-2.3206175422942	6.08357663560064	-0.619587990570797	-1.94030111539882	11.9792522422301
TempMaxPre7	16.6760138165697	1.69664483798718	0.548610094416724	0.0505347252646404	2.69780229098569	-1.6592298750373	-4.54515425345294
TempMaxPre8	21.7926582627929	-5.46185180585726	-3.12839908470829	1.6609766969895	14.8345506456678	-7.13386819993271	-4.92987644493215
TempMaxPre9	20.6100784893154	-7.08588584021694	-2.5324458391461	-4.54636837919163	1.27623953009908	12.9141624695023	9.93281209031935
TempMaxPre10	22.284695040375	-4.11159787703722	2.05993812262861	11.9885059047793	1.9338516714534	21.2015839598201	4.09525985630769
TempMaxPre11	10.9058441457002	-1.82427573995188	5.28607197671695	-1.64108747941922	3.14501538230916	-1.75853839667096	-1.39115627903158
TempMaxPre12	4.75720152678805	-5.1971394195827	-1.62747697536529	-3.50718346441771	5.1247591181249	-0.392846444486587	-2.39098086548617
PrecPre1	-1.79459688720126	-7.47331691181391	5.18068325559848	6.1010672894801	-3.1859214180341	-10.8126834983077	5.66195036830559
PrecPre2	0.503680524820857	4.33645063316261	-0.676133515106699	-7.24197827127247	-2.46213925849319	-8.05528294748869	6.04962882126959
PrecPre3	4.88751070011195	-1.36911531510277	-4.4756006891167	0.782352624491519	-4.16738264920295	-5.72417457096267	-7.98622974575737
PrecPre4	1.40644665157788	-5.65814773030912	-2.8797249765579	-10.7371988828293	0.761829304697508	-4.83872349757007	-1.05809655547667
PrecPre5	-0.939381956839791	-6.85876767221045	-1.81696039904966	14.6626172836592	8.24828199683426	7.91871229369155	4.09035992266679
PrecPre6	3.20410184147885	-5.37124728193571	-9.59737474198211	-3.830951430897	-2.23159261088341	2.71441515401029	-5.24270356208236
PrecPre7	-0.760583688810858	-6.34751215884521	-6.82398240857843	-1.37831343883961	-2.66928700771816	-2.7364812667088	2.48442357677046
PrecPre8	-1.07388723740359	-0.658135269113633	6.62070975335369	-4.64389285370745	1.53409454311864	5.08997475860387	-5.81884997193529
PrecPre9	3.01365668466214	6.69324011149019	-4.56452189570342	-1.95245706442387	-2.97343142682873	-0.613729585013498	1.08909871751938
PrecPre10	-1.08331445038281	-3.26262955647949	-3.92330526933416	-7.87289170600989	2.29135474246023	10.2615137950362	-9.31764392740527
PrecPre11	5.02627447106725	-4.59966745262997	1.25874628799652	-2.45234366555559	0.540526660169907	-1.77178589158424	0.962425792946322
PrecPre12	3.83912037890918	-2.70262179738348	-2.09036621386437	-3.98380098984741	1.99956104197369	2.84059034742452	-0.645202603328429

## Sheet: All temperatures
%IncMSE
Variables	Composite chronology	GM	MT	PP	LO	PO	NO
Temp1	-0.727291537118775	-3.72948299562942	-3.27627234304257	-3.23557399413231	1.67930656926302	-3.31024687269867	0.0168266541631324
Temp2	4.81893784282839	0.907252108473888	-1.6892651672617	-4.36227843425659	-4.50203045762882	-1.09758789287493	-4.90289696566457
Temp3	3.77276259205783	5.2921801569123	-3.63735644188285	1.82486481965995	0.271294971898324	-3.78967767034902	-1.28293638560236
Temp4	9.34217873384051	8.19515867908084	1.48429157375413	-2.40701928195111	-1.98762990139286	5.1518879878084	-0.784033339383379
Temp5	9.843661412247	-5.17917842292633	2.80909458789276	15.9126835923134	-2.30584745571228	-2.64688448842405	-5.11251913443473
Temp6	4.35387178123327	4.39542330046054	8.32269141795672	0.681968434579526	5.63667089432796	2.19180430591281	3.57954520171071
Temp7	7.05548907738022	-3.48623753089295	-3.82074379034605	-4.33305997047874	-2.63186286326148	-3.31802502661214	-5.69124978647849
Temp8	8.42945885396318	1.91246967716453	-1.1220444080147	-0.75242617175559	-1.79752642112779	-2.63815614573053	-4.51461658611384
Temp9	3.47337230717929	0.233301289205614	-3.23350659556806	-4.30247106485551	-2.8381470001825	-4.19531796403167	1.22654298429156
Temp10	6.66518917897582	12.3238453115838	-1.04978689596766	4.42649957000547	-0.00754223413867809	-3.08249498609739	2.46068807091612
Temp11	6.35127050041191	-1.6485930330209	2.24712055790301	-1.1636931066178	-1.32258411698375	-3.71197568144656	-1.98151864614738
Temp12	2.92373113100454	-1.17695558794925	-4.03896139501319	-1.46383492270604	-5.76264024041071	-3.74176772293504	-4.26658432894706
TempMin1	4.167727728847	-3.65906635595279	4.43798313079062	-2.48273408221134	4.98013165482236	-1.2072029251875	-2.60647837676758
TempMin2	10.7405963151142	0.398679303370439	-0.449864618745358	-2.93459748692381	-4.62318132277644	4.57348451120668	-2.77868335595236
TempMin3	9.45851551608134	9.19261262414987	-2.35340885546321	2.71060620432621	1.65711170407673	-2.28937772614782	-4.4756924313313
TempMin4	11.2450653777942	5.39522630792643	-2.51055533316654	-2.27887067810046	-2.02517915938346	2.55360905700953	0.764722461206167
TempMin5	16.5283374548325	-4.03063504709934	6.42651298570081	19.9299304527107	-6.34464639308858	-2.41888481640825	-7.62413193915737
TempMin6	10.5384901818946	2.34136403761055	3.87460920778794	3.89984213742224	0.431018097081073	4.43914142033279	-1.00478344908814
TempMin7	16.5039052923159	-2.2422993271104	-5.31250808214381	-4.84171231075536	-4.88710180636315	-3.42478628256155	-6.23903304124055
TempMin8	13.8717464442871	0.988818053556617	1.95947567391415	-2.45591090444077	-1.89368399344889	0.169336135534308	-3.01598236925962
TempMin9	9.70423533788976	1.00292740064097	-4.53270877744096	-1.88044226915552	-2.66823412148153	-3.11114176461076	-3.24155621753726
TempMin10	9.243460268131	7.65557886902754	-3.35872125239652	7.28832512220203	0.221554102669131	-2.03845484034041	2.99183248874653
TempMin11	4.63425214551125	-1.02529755366242	-0.835176193665883	-5.78115706058177	-5.35254665707294	-3.0658940677801	-1.96813296169422
TempMin12	3.51073983436729	0.106457414666179	-4.94543419543514	0.222375218658192	-8.4982339405907	-3.80347173989288	-5.44757290183448
TempMax1	-4.07944873852024	-2.02309488002207	-5.4229834848209	-1.90730024193483	-0.510479590530977	-0.913413292808992	-1.2328003796907
TempMax2	2.44773907610633	3.76151488133184	-4.70427069037996	-2.14748695807508	-4.94500156859291	-2.70363251777533	-5.13036669767841
TempMax3	17.2891741206521	-3.22847429708012	-3.22123701354899	1.78716385353369	2.87715628984949	-5.84906810508601	1.06410269654744
TempMax4	6.35625368795477	2.0096919591817	-1.69984189748675	-0.0982329802977421	-0.317413052583035	3.14731954547266	5.46437995312066
TempMax5	24.8331964400394	-4.33777427099353	1.58799937484592	14.5592094326748	-0.977426502697524	-1.98424789038866	-2.59301062089787
TempMax6	16.2417957043019	10.296216271737	12.2877054983238	-0.200212734174272	3.16762772257017	2.95110401139571	1.92379530186073
TempMax7	16.4223287164592	-3.77055157726228	-4.26519029317324	-5.20129161656108	-0.448493097423736	-3.51047576520262	-6.16397592852895
TempMax8	15.9643661218564	1.06069854271237	-0.0747598037903183	-1.38936791104012	-1.28583168637072	-4.14198549133196	-4.18830567748328
TempMax9	12.5902738174572	3.01184275002184	-3.91598331518147	-5.20263975144979	-2.2568830673372	-2.2414953763809	8.21783830354409
TempMax10	5.21307538764537	10.0561920465949	2.92304443468165	6.08791739044759	-1.70720022940915	-4.37792086668666	1.33051799527519
TempMax11	6.7662100386345	-1.00302738308087	-0.126830294519236	1.48460239948483	-2.46055114079969	-1.76894197157099	-2.00542954081727
TempMax12	2.89018179138227	-3.76239239537279	-2.26842909657663	2.78871757696782	-6.11496801593175	-0.358147802472364	-2.60509188032864
TempPre1	2.50779487039234	-0.10487413585777	-0.841600836824097	-4.95485572586975	4.95550858298008	3.70107009233035	2.13089376369147
TempPre2	0.767136376372942	-4.79845645481502	-2.07155269010314	-3.4709893657543	-2.39411146694803	-4.39920540142311	11.620534112773
TempPre3	8.10564877193485	2.80145977955401	-4.69899398940653	4.3767352972698	5.55356871475439	-5.69850741466297	-6.01078065717402
TempPre4	9.2972728335523	-1.2080607770192	-6.35773349427301	-4.47341866260849	-3.02293900584166	-1.16758629223512	-2.12688128663891
TempPre5	5.63593393540282	-1.83271905213031	-2.83233419926027	-0.961076578220515	-1.50424241483718	-1.37771761969711	3.6453746135421
TempPre6	14.5165225774775	2.97730167123761	-2.93593936805591	9.20893558657544	0.047549242002517	-3.22022651996671	13.0723934354684
TempPre7	3.94043389861518	2.5931255390418	-4.73046135233515	0.303248701361257	3.15247661534901	-1.71520923185492	-4.50890310319646
TempPre8	3.72100268059498	-4.80933819665067	-3.41010751946383	-1.44545423837788	-5.9225227722118	0.893980592492748	-5.19459511164811
TempPre9	7.54135886801289	-3.79231001422551	-3.33892758360315	-3.75736051379854	2.58583695723395	1.47105796654737	3.18549285227195
TempPre10	13.6430693499427	-1.01022865224594	1.36159913987816	8.40669657137301	2.61730795260911	22.8861786486376	0.400601447312697
TempPre11	3.00512065875403	-1.33183556504652	6.36125348144229	-1.87379198691676	6.32124059176308	-2.29144581886662	-3.02938133483945
TempPre12	5.93781277618963	-2.71507492245707	-1.81545673963558	0.255691468967766	4.13128448927978	-0.831856814678647	-1.29780463941386
TempMinPre1	6.49887569501899	-2.35286185300159	3.38119977309302	-1.33907237773495	-1.68586188053657	1.91343355360226	1.88382011877389
TempMinPre2	5.9831914808987	-2.08506305693189	-3.00690522023987	-3.35342926194445	-4.94784200865024	-1.58174611292379	12.0445649273883
TempMinPre3	10.030657981264	1.55593206576227	-4.85199646235964	-0.60319834313585	5.65855870038906	-3.25342171708811	-5.98793074947454
TempMinPre4	10.4673435997664	-2.1990300481952	-6.4189987616309	-4.38470884136888	-4.97691052217144	-1.34869991867583	-0.128397191565536
TempMinPre5	6.46184359455762	-3.10725588082914	-0.0266663916115933	0.558592497204222	5.59679122473739	-0.950541401614389	1.5049862131736
TempMinPre6	13.865825420647	2.26582704946847	-2.8695094588148	10.6101947643863	-0.699179881808954	-1.06785815120215	13.3615448599637
TempMinPre7	13.1638312525702	0.189251469395259	-2.30365606292201	-2.05388170230702	1.07909211230528	8.98380162431825	-2.69485352806002
TempMinPre8	15.3930663508847	-3.20775547523804	-3.45071418779744	0.223571111238279	-3.14018470221184	-4.65485329305359	-4.97014026264462
TempMinPre9	14.070779747674	-3.67243626173843	1.5286090447879	-4.33098148582141	2.29809488717941	-1.1048837734145	5.22407432109464
TempMinPre10	16.8463138982065	-0.699816171725261	-0.274553096072291	8.29201587876165	3.62997022196397	22.1191348710173	-0.692095230669178
TempMinPre11	6.47087743005358	-2.87542799990351	13.5945504029734	-3.42360574272438	1.48438260301101	-1.51271215923588	-1.96032657296484
TempMinPre12	7.59841823597335	-3.24341993824631	0.0733906901233833	-0.0698787200582369	13.3089317639575	1.8979701585724	-1.39672995243326
TempMaxPre1	-1.03720665605168	1.37968436935882	3.07389995548439	-3.13569921979099	-2.6351345890099	5.39098457567565	1.44884298005673
TempMaxPre2	1.5448208064234	-4.40932888818034	-5.30183131408083	-2.01804324873538	-1.04427663030715	-3.02611256062749	14.1340617028086
TempMaxPre3	9.6740149819495	-2.0258269723239	-4.76113474191606	-0.652772112947797	-0.597973223864511	0.670461741537776	-4.21320489147715
TempMaxPre4	9.4095674488876	1.95696883414893	-6.5916435227007	-5.03265987618349	-4.74118581820307	-2.31957874600009	-2.33891202581777
TempMaxPre5	17.1406963480748	-2.02065511454477	1.05233891667332	-1.33772152368405	-2.58675283122493	-3.93944327109825	0.745373813093538
TempMaxPre6	28.1024776798849	10.305890994666	-4.55340614157906	10.5851132927662	0.321694884944032	-2.37365120723587	11.1200729116391
TempMaxPre7	12.7749481729649	4.01740988522158	-0.82038429146442	1.1471742591424	2.30995279146726	-6.5625537955021	-3.85059185024419
TempMaxPre8	17.8671540678118	-5.75670537953641	-4.30806466313475	-2.58421531923669	14.8411145945324	-5.33717804200585	-4.45672439522987
TempMaxPre9	17.8867769582751	-5.03887973952042	-3.48967821665976	-4.83776553565508	0.534065595772899	11.9487731152849	3.30808221025535
TempMaxPre10	16.0856287196675	-2.25848548746079	3.40144102279111	11.2202160099648	3.11427912440504	19.1270290736064	1.92875351808049
TempMaxPre11	8.01415440359067	-2.49625436487513	4.35030991377321	-2.49028685704759	3.96432957389617	-1.51523699934346	-2.76490401743027
TempMaxPre12	2.43373102079556	-3.66575355986537	-1.51585966155347	-2.07462048458853	2.08388482016984	-0.931727830392539	-3.76834181224014

## Sheet: All precipitations
%IncMSE
Variables	Composite chronology	GM	MT	PP	LO	PO	NO
Prec1	8.75387643803638	-0.792277031872677	32.9966667780217	4.61082999838187	-7.43067169715893	-6.08650046365278	-4.93878518917548
Prec2	8.51991511365117	-7.21339257499482	-3.81015581634003	-6.74506028323216	-1.74374760026189	-2.83439527144842	3.50623397833516
Prec3	24.5648447025958	1.46814752320506	1.17111601253677	-5.46338191362271	-8.38426545822921	-1.18709109596938	2.26109076309046
Prec4	6.03155005862697	-0.713424745640087	-1.10395480016738	-4.30316026752813	-6.31272189278817	-7.89851939043107	-3.30322046431503
Prec5	15.8042028957298	-0.0508407445355571	-4.88338330437276	-1.54942954684964	6.48087846627035	0.480487756625083	-8.58910067143832
Prec6	9.2735686005025	0.778332630661369	-1.54591840112777	-0.960901037477402	-4.79108554131192	-4.89953848853663	-3.87121621026427
Prec7	19.4608370279424	3.20164413952205	-9.1741786313749	-3.20165143157791	-2.00902774252712	-6.99241342324388	-6.68313057218088
Prec8	15.1694711774175	-4.37753704957613	-6.81285232891097	6.44002929010526	-5.81302917215627	11.5022225485847	-4.66073339116853
Prec9	14.710060512676	-3.36634783334421	-5.43956988386027	1.84795085027281	-5.35070182953133	7.64026583810409	-10.0556503325264
Prec10	10.3604966744627	-7.80494613055143	-5.5640789953609	-1.14528216249246	0.627020352526601	2.84197845330897	-3.12323827350268
Prec11	15.5205056217526	-0.310142792232419	-8.36297341054505	-3.74018137804941	-0.621142799500898	-5.34258542982119	-8.84678039231085
Prec12	16.6697606022228	-4.5676123630245	-6.0199495847361	-6.5384264197027	-3.14954403865712	7.16100369608438	0.570023864634613
PrecPre1	14.3724154123871	-10.6050257484224	7.06691307562311	2.19076738315555	-5.97303404795677	-19.3191684040655	-1.7667946260205
PrecPre2	10.9953537936923	-1.54907212105269	0.326075653173822	-10.5103071541172	-6.46233796975291	-8.91760289834853	11.5252111064703
PrecPre3	11.0084716198106	-0.592937846833149	-4.42462357501468	-0.408910722759232	-7.2179640902579	-5.8840012184851	-6.72967751912513
PrecPre4	4.86492564518459	-8.74340100486908	-3.02868823166923	-8.15753314882097	3.908383576256	-1.1648701068861	-5.72471819671236
PrecPre5	31.5467946592312	-7.85827978108221	-1.67482095153045	22.8341138456187	10.4589340180873	10.4334917284769	2.16293099568814
PrecPre6	17.5841313155816	-6.30598352168054	-9.54688844233524	-3.24505137125782	-3.63453528392591	1.60949612742006	-11.3004784483305
PrecPre7	23.2820029540993	-7.52391499518109	-8.58779245116765	-0.0977143021077029	-4.50467324013484	-5.578888719306	2.6339222231328
PrecPre8	5.99709955856409	-1.47378847758721	4.66174807592389	-4.81341377899966	0.903927660992586	5.0792090015844	-8.78594574831896
PrecPre9	6.83955231667632	4.57992888685387	4.70999531668784	-7.40645013373514	-3.32705336105436	-4.89563270047558	-5.88527387608049
PrecPre10	3.41499579507751	-9.46426763823863	-4.69997555084178	-8.99844837452365	3.69372761762671	15.6103599502231	-12.3599934213324
PrecPre11	16.6253937126283	-11.0750288744477	0.17771709474401	-2.60175033212119	-1.89426192452312	-5.70719697248543	-0.937236423588317
PrecPre12	14.9865438963089	-3.12500850518121	-4.75634302957214	-11.8916723585856	7.02429499884216	1.31989644936888	-6.9046279123703

## Sheet: Current temperatures
%IncMSE
Variables	Composite chronology	GM	MT	PP	LO	PO	NO
Temp1	1.94458528664217	-4.36607589528061	-1.47035922052348	-3.15315958412121	2.1362542175094	-3.74253070546584	-2.8135694075356
Temp2	14.4158015214053	4.05390891609494	-3.18343560420568	-6.47551688665843	-5.92832875959137	-3.00945043736419	-10.2346152478589
Temp3	10.4975510952767	6.38503295889475	-3.47018967498735	1.30193230419871	2.31907090664733	-4.41471911136426	-2.51533976948781
Temp4	17.2166486174639	12.4430348027714	1.92461725286483	-2.93465956423414	-4.31913538676251	8.32716526878469	4.43317534095605
Temp5	16.3801670956637	-8.05886900614296	2.65054837650548	16.6713204241767	-1.38391830824978	-2.05817213877294	-4.15717955791823
Temp6	14.253935322063	4.2525454043998	17.0323068205274	4.00645576887682	8.99191689604427	5.26980085033348	5.53909487416343
Temp7	10.6841426481708	-1.57708923872849	-6.47635266668725	-8.21611528845609	-2.25844302587921	-1.89058992664121	-6.95611361141712
Temp8	10.8593908959423	2.36316422826689	2.374792502508	-1.86196156444993	-1.80375484635673	-2.56523331091555	-8.63060850853095
Temp9	3.98105018276635	-2.19680057908404	-2.18072473624176	-5.81413353572207	-3.73893169965397	-4.73335626838857	4.69187513338985
Temp10	10.846148453482	16.7587470129843	4.63731244052315	7.87287243946478	-1.18865343923138	-4.7449873509587	1.15181156855543
Temp11	9.4826196945849	-1.76101697156943	0.551423605238166	-1.27431527135485	-4.13079229578817	-1.6931502380791	0.137434704474855
Temp12	6.56469687899695	-0.572101560293089	-5.04723335311145	3.33310619821872	-10.8386512748808	-6.3978915997788	-0.998468549235583
TempMin1	10.3970498892695	-4.47109043154148	9.96365199249153	-3.36060903739842	-0.10976930222336	-3.28150056545487	-4.09597984123937
TempMin2	23.0768513561337	4.29683503964671	-1.14527639915595	0.517583135856041	-5.0967766314695	2.26228265158532	-8.02969865681393
TempMin3	15.9216885624308	12.4986143809036	0.223964566828369	4.26684981975699	3.7341145681822	-2.35662239724639	-6.26842904254055
TempMin4	21.1174442155423	6.83881873173355	-1.31037764173981	-4.06037530519834	-1.51621625703336	8.12439700496408	6.96093703908158
TempMin5	25.7107816659168	-7.14421490136419	3.22326229850302	22.0464972518977	-5.70416121942486	-5.44587850135749	-9.55091209237303
TempMin6	19.2391747509712	2.23323582245994	12.0218757014543	5.15855323536302	4.02268615458841	7.00367344417636	-1.65609624065408
TempMin7	25.9392635648781	-3.44095826048571	-5.71608876776508	-7.96397270423232	-5.47676584770288	-9.65626535899288	-8.59847363644995
TempMin8	26.1236129061269	0.0355919450485772	5.05466849036912	-3.67426695675256	-1.14238870385466	0.377737540970284	-4.77533321706867
TempMin9	15.4855301554068	1.23159973035067	-2.83191194676581	-7.52869221831715	-5.91056125512807	-6.43826688774024	-1.14775269386101
TempMin10	19.1285374835516	11.6290788138351	-0.224578994529408	13.5369601324925	1.58371778113837	-2.03849458403046	6.17183337218387
TempMin11	12.6910108911157	-0.0152468001625446	-0.734787813427284	-4.92973561824768	-9.48597198623862	-2.12955296629924	-3.349785541492
TempMin12	8.56558115242006	1.77715212500878	-6.61518503879516	3.23209659450875	-10.3562987006859	-4.58849734969054	-2.51647023087942
TempMax1	-3.85734633510339	-6.06849240011436	-7.00481325298515	-1.49512456489831	-0.443133184738406	-3.26672010572797	-1.26604276950512
TempMax2	7.95382139497256	8.66551619445068	-8.2846566322021	-2.73051629120821	-5.45588315640013	-5.77013147442973	-8.40712006517712
TempMax3	26.0512513147508	0.730216873965949	-4.27058511075285	3.98758537601525	2.96854254583268	-6.35949091373438	0.716500972610333
TempMax4	9.62776316700027	2.42930726127797	-1.64716066115713	-0.153955773197501	-1.74798195362168	7.66445138550303	10.7790395672194
TempMax5	36.0486853183768	-6.88670698679992	2.20713101876439	17.1729254483954	0.0836464225189834	-3.22763836628547	-2.9275874940138
TempMax6	26.0338373943634	10.5552993262834	19.1688304653391	1.67901880216601	4.8378665920024	3.79798166187691	5.33016400876865
TempMax7	22.9385924600952	-3.52914171399781	-6.94193568755208	-8.78887841125581	0.302478761809428	-2.79616567689285	-7.51119450310527
TempMax8	29.3016176155764	1.62105932981447	5.05762434390425	-1.96165631457869	0.840865408549869	-3.81993035039271	-7.58541228113096
TempMax9	23.1371403240003	1.43276524105758	-6.06751480456398	-8.15990310406432	-0.223885002374683	-7.27763055193805	11.932215907701
TempMax10	10.7111347316155	10.9646850104203	10.2353128449175	11.3586600205479	-0.415388674080787	-4.82632308037666	2.50793114650345
TempMax11	12.2697939464772	-1.9888989725421	-1.93651294905906	4.31191923882061	-3.25755003796605	-1.02173274505802	0.244141006430469
TempMax12	6.47562328157064	-5.23297573631664	-2.77091121469509	4.66491019484755	-6.78493407332352	-4.73318541956716	2.05390582369905

## Sheet: Previous temperatures
%IncMSE
Variables	Composite chronology	GM	MT	PP	LO	PO	NO
TempPre1	3.35895537678637	0.393123916593954	1.21630599700262	-1.65707416222346	6.04260569694414	7.14228934996745	2.36073245515215
TempPre2	6.37673454422434	0.359635154402366	-4.35402023533323	-4.69806531127875	0.622124218218197	-4.18820282286115	15.8709941616797
TempPre3	14.6348045228382	4.92167130789186	-1.75244873127472	7.74736972104521	6.61374838553583	-4.58738872659527	-6.17122498611209
TempPre4	11.1672921932869	1.27717600062408	-5.11129109168963	-7.45024150056458	-4.65890247701437	-3.20274281266294	-0.483810523315847
TempPre5	12.1855818091602	0.391819381424437	-0.388178510560778	-0.120032972296922	-1.56203863175408	-2.69788418229598	7.19523520573962
TempPre6	13.6661954678106	7.18526772465719	-1.52396779689697	9.68006983927206	1.89651610795708	-6.0178699055067	14.8985480395115
TempPre7	10.9208530352359	0.468770127325791	-1.38206880889045	3.53909843722599	3.70966745993234	-0.565403922972682	-7.6738387105638
TempPre8	7.2193993813768	-2.6270029402436	-3.21102491731289	1.81272553092042	-6.1854269459559	0.276489422857459	-5.59595627984268
TempPre9	12.5957721810578	-6.92882821189287	-3.18214068285394	-5.63834303133232	1.89072451695691	1.35379251312913	7.71060789629882
TempPre10	20.7822461109052	-0.15393257164947	3.54932701246404	16.7576862786467	2.38649091356826	24.778706235281	1.56762282866204
TempPre11	8.47897072198683	-2.67195863891603	10.3091950132327	-1.84023304883238	8.60757527503369	-2.03534374570422	-2.83074739205787
TempPre12	8.1550311746493	-3.12735805528018	-0.885203204215112	1.02900316457187	6.86181848235857	-2.24286270063371	0.427369299181765
TempMinPre1	10.3448360432955	-0.631074564611534	4.66943294441326	-0.0925476316399385	-1.58253634757268	3.41808235703392	3.06402256900164
TempMinPre2	7.52483884890535	0.457147424832302	-3.97037345188375	-5.88039815352135	-3.53817737687546	-3.78329504763087	15.2401277061296
TempMinPre3	15.2850432953954	6.78934991253215	-2.20788370406001	1.7536258447221	9.04858224856631	-4.38680144765321	-6.21765766299627
TempMinPre4	14.2768110221586	-1.71085685028799	-5.33473219727874	-8.48777861848667	-6.100087415083	-2.55221104241012	0.225183851206817
TempMinPre5	11.1364628814905	-4.74231520447306	-0.569219671312862	1.55851271747407	8.15621187737006	-1.05878114306017	1.52686482730328
TempMinPre6	21.5484743271737	8.1015438422052	-0.175863848329725	15.4940823404966	-0.411234242214966	-3.13903471416906	16.5962264912197
TempMinPre7	19.3787709793958	-0.0312120762406438	-1.97313547190413	-0.290763049144578	5.02975181678291	15.1110112432876	-0.0322699337585115
TempMinPre8	22.4782717566405	-1.09162139278559	-4.18868018743893	-1.87131349330304	-3.1614516890452	-4.91719889856632	-1.44490293815342
TempMinPre9	19.5129829768297	-7.23640049943021	2.14472355896566	-6.47437776736248	2.68218784713632	0.294994433293373	12.8130519426131
TempMinPre10	25.3700729329911	-2.17034551296067	-1.53106556241695	13.9127410587848	6.85185456711287	25.4269666873686	1.02165214074878
TempMinPre11	10.8050773546003	-4.74047570787625	17.3561343670706	-1.1261046944319	4.82607591277473	-0.258155189918587	-2.03412827228969
TempMinPre12	7.87897952830905	-5.31106649166333	-1.1041830295267	1.09800798835444	14.6306855623604	1.83098397029174	-2.24425160971491
TempMaxPre1	-1.81475145702114	4.7595071179909	5.32408951080349	0.997517688812877	-0.215853096374064	5.950028706646	4.56619303441136
TempMaxPre2	6.16555554681231	-1.0070236909175	-6.07918579282637	-3.61297557058489	1.30017860288195	-3.73691169055728	14.4815069591462
TempMaxPre3	13.0519345729366	0.460427337015732	-2.10423053471292	-0.538677767169527	-0.595796370080614	0.0179131461360626	-8.08970873171519
TempMaxPre4	10.0611467708806	2.00224349058365	-6.96551917042071	-10.2223233685994	-2.10777192565643	-4.65621244663344	-1.7597229103634
TempMaxPre5	23.2813869810077	-1.16603671516156	3.39834542851015	-0.802392531829566	-2.83333726203471	-5.27519827080349	2.67986226662864
TempMaxPre6	37.5326331455936	17.4709381833646	-3.82955342412291	7.4839304248866	1.50721968777888	-2.35299266968514	11.5906508411076
TempMaxPre7	19.3853880103843	3.94702619573563	0.10920784483974	0.52365796294455	2.32392691279731	0.486216337903147	-2.71741725874639
TempMaxPre8	25.0957884057274	-5.1996294388743	-2.93570310263595	4.55797053489733	17.8434182894398	-7.76998710479618	-6.23656838471217
TempMaxPre9	24.0710768124682	-8.76392830153652	-1.64306720085736	-3.8826884543911	2.7771425768492	11.3930267089756	8.50229934413855
TempMaxPre10	24.0804091954033	0.731479602826116	3.55596340263746	15.0284788872664	4.73810379264504	21.9652897162929	4.4051494402387
TempMaxPre11	12.3061505507109	-1.84617257686833	7.42785044186469	-0.305348333536024	5.35773136332438	-2.44829187489292	0.118071237319094
TempMaxPre12	1.34517251883242	-4.55093499908379	-3.69570380591746	-3.62459386642957	6.52950196573572	-2.0180243671055	-1.71271434509979

## Sheet: Current precipitations
%IncMSE
Variables	Composite chronology	GM	MT	PP	LO	PO	NO
Prec1	11.9907401977866	6.08593437391121	46.3468142312021	-0.713114498178994	-10.6870829029706	-6.18667325339342	-2.54281568034122
Prec2	6.71661508894576	-13.8750406714033	0.120986880208632	-10.7095918070696	-4.50216601184194	1.52319081934367	5.42595149530406
Prec3	20.1690612236369	8.01295279695111	-1.69148894003789	-6.67917669408044	-9.10807909788157	-1.94227693553813	4.72939952573577
Prec4	1.42161996993693	6.29217542232359	-1.46299237012204	-10.0965600128488	-10.8602739456884	-12.9001730794047	-10.3657208455936
Prec5	16.3333098078664	-1.69638790092274	-5.04859058942813	-0.834366163244594	5.9538349654011	1.29982877999752	-12.0404160039076
Prec6	13.1423253259648	2.19730680832483	-1.24425886465778	-4.70366960905834	-7.42091595732884	-5.98937790493715	-3.17265782929761
Prec7	21.9980121887563	11.848573896408	-9.81956571262257	-4.59664958955085	-4.1059462369679	-7.54410802116511	-6.77201661355044
Prec8	11.6656779026982	-6.78294372903166	-7.25771154017898	6.97835115053918	-10.3852002984765	11.4074610946137	-0.849729772403973
Prec9	14.7764598544725	-8.06723714540907	-5.72924408471547	3.44294375477628	-4.14959574485537	16.7024569215812	-8.81675143079339
Prec10	8.72716297860404	-5.34811161629605	-5.42035759827343	1.05945993951462	-0.937273504298066	3.48144419602575	-8.1225213007718
Prec11	15.6341324713534	7.65652008589647	-13.1932204259754	0.145139433310162	-5.99437550931322	-9.40610874212412	-9.32494666643822
Prec12	17.9452164686819	-9.46706644897329	-7.95955284680676	-12.8585748109508	-1.00924752475364	-2.24232478693283	-3.19966301367565

## Sheet: Previous precipitations
%IncMSE
Variables	Composite chronology	GM	MT	PP	LO	PO	NO
PrecPre1	21.4736428153702	4.20055619372345	14.3369365062285	2.58246014205455	-5.90643476206906	-21.3794258421492	-0.452761256951473
PrecPre2	8.50195677547399	-1.09734973238983	5.66630474533853	-14.206927242614	-6.1886458905662	-10.7213087405804	8.52922659436791
PrecPre3	14.563722856495	-6.8194100636877	-8.33902871878576	0.130507861510891	-10.2084049666122	-10.3152382018826	-11.4596473477833
PrecPre4	-5.3632063167725	-7.52641848834233	-4.22106540577285	-21.4630329068898	11.6220831416793	-8.59032398204565	-4.14458504040274
PrecPre5	40.0814610264193	-9.71454854155031	-3.60978782858183	29.8726005636936	21.9994710034163	15.3370098242947	5.67252945304781
PrecPre6	19.1740147203463	-11.3630564526788	-13.6368496972449	-5.20402503314925	-0.292929023292931	4.7258467778289	-13.8055786478795
PrecPre7	24.4707361225717	-11.9508380071355	-13.40029942407	-6.76017770598342	-6.88784216755136	-9.27646089025689	-5.91571008088035
PrecPre8	6.87350326129691	-12.1487521771702	17.1180195711383	-6.15052430446226	2.16698021451898	6.46120175048947	-9.61736474097092
PrecPre9	14.8149921943316	-13.5449555388929	-1.2538585849092	-9.60872429986137	-2.56677173891504	-4.87429021346579	-16.1623801814652
PrecPre10	3.22743139652959	2.78408647011297	-4.42723563077738	-9.04484389282861	2.22589758928581	20.0715732513174	-19.8802638863351
PrecPre11	21.9720953402958	-0.850247222037806	-0.993148089428712	-5.30148511377637	-2.69936151658312	-11.4580523023039	-3.17032935302359
PrecPre12	13.8088727958444	-0.95884384160619	-4.55101619404518	-13.3641538488663	15.8925004016416	3.0039666241559	-7.79861340397029
