# Supplementary material
Source: MDPI journal article supplement (https://www.mdpi.com/1999-4907/14/2/166)
Supplement: s1 [file s1 › Table S2.xlsx]

## Sheet: Composite
Variables	%IncMSE	IncNodePurity
TempMaxPre6	30.7722143811022	1.75929456687883
TempMax5	25.8716107058046	1.84888888793812
TempMin5	19.6809875426108	1.77734716863569
TempMax3	18.6099261920172	1.18489365504069
TempMinPre10	17.4866161079247	1.49669051603952
TempMinPre8	17.0392773589047	0.953943945563794
TempPre6	16.8271856755071	1.58650294891834
TempMaxPre5	16.6826736953725	1.13196949332659
TempMaxPre9	16.6531968881756	1.09730449285608
TempMaxPre8	16.3900564440672	0.888414314559399
TempMin7	16.3387046087928	0.902750854899517
TempMinPre6	15.6965257273545	1.27931694295889
TempMax9	15.3164418285254	1.34862979408085
TempPre10	15.2972402193318	1.13187122820552
TempMinPre9	15.1785335229948	1.34283983296226
TempMax8	15.0127693848228	0.843161244215129
TempMax6	14.5710361762845	1.07388585931227
TempMaxPre10	14.2809086744069	0.986273629656551
TempMin8	13.7615913866209	0.912020347907809
TempMax7	12.7304269206333	0.823875356919321
TempMaxPre7	12.3849797905886	0.692304096844845
Temp5	12.0403139740546	1.57932639208809
TempMin4	11.5385984215377	1.04642340625173
TempPre4	11.0620754354747	0.866426906080479
TempMinPre7	11.0227747654724	0.551287449397046
TempMinPre4	11.0170280148508	0.848841025888789
TempMin9	10.7680428739213	0.68385017431357
TempMin6	10.5913112615062	0.733060634768676
Temp4	10.2395243803885	1.04237354379702
TempMin2	9.44680268647342	0.815842173451209
TempPre9	9.16642823469473	1.07407628015167
TempMinPre11	9.10889672975011	0.671173987820488
TempPre3	8.66603632451391	0.68906644710896
TempMinPre3	8.40529017487736	0.493422977735432
TempMaxPre4	8.36747213097224	0.690310618548972
TempMinPre12	7.85483991777873	0.660699165379391
TempMinPre5	7.80413101269727	0.75350137313342
TempMin3	7.78749974469596	0.489931985520731
TempMaxPre3	7.75967310928489	0.761414037042797
TempMaxPre11	7.64468752459292	0.646511622485666
TempMinPre1	6.94065257672892	1.05691394646622
Temp6	6.77194814248849	0.761512397300082
TempPre12	6.75819817000499	0.643755319703569
Temp7	6.36636583514783	0.652430556498825
Temp8	5.99429116449649	0.519293638838194
TempMin11	5.87659895497905	0.496274574472889
Temp9	5.70888426799151	0.923810816488436
TempPre8	5.68836339991531	0.605108456859462
TempMax11	5.56672252539792	0.631838897062551
Temp10	5.3900943102051	0.484664918235672
Prec9	5.29924864707437	0.582470381534895
TempPre5	5.23751922033943	1.09871133663197
TempPre11	5.14027792258605	0.476105613117491
Temp3	5.10153082395941	0.617002234848762
TempMin1	4.9893396373713	0.770753369171185
PrecPre4	4.82838201907966	0.727696916411936
Temp11	4.79745008030028	0.477435009108142
TempMin10	4.77172169410365	0.450476299609788
TempMax10	4.59906572341185	0.601616291051485
Temp2	4.58927754585813	0.530218171159978
PrecPre11	4.14112363286974	0.786888241239328
TempMaxPre12	4.06691409194381	0.532540834869685
Prec8	3.57750720589159	0.76841816148501
Prec3	3.36433194331116	0.558310270605573
PrecPre3	2.95645809392575	0.54107109225898
Prec7	2.7315007452946	0.62559486781392
TempPre7	2.02766917900684	0.353358395548767
PrecPre9	1.22829689595751	0.509830141520841
PrecPre2	1.03525196508105	0.582097234862855
Prec1	0.762152569577109	0.859807403150512
Prec5	-0.0932470164790426	0.464234727321494
PrecPre6	-0.130796033549165	0.514761607423352
PrecPre12	-0.150604290839458	0.799553715247032
Prec11	-0.170751892876382	0.684833502665316
PrecPre5	-0.23529407154485	0.630579185652356
PrecPre1	-0.255655060977899	0.456816577518098
PrecPre7	-0.329420709610198	0.670802676356568
Prec12	-1.03875196387124	0.531830463237086
Prec6	-1.54920875808019	0.513963600955894
Prec10	-1.84084342320555	0.460615478109729

## Sheet: GM
Variables	%IncMSE	IncNodePurity
TempMin3	30.8751776725561	0.411704213951038
TempMax6	23.4052004036651	0.453816752719005
Temp10	23.3281344040555	0.386615688885593
Temp4	21.4887508607047	0.405279022155806
TempMaxPre6	19.8358905368492	0.392448531831549
TempMin10	17.5868278591792	0.387325099360678
TempMax10	16.9431008887572	0.413206291777893
Prec7	4.3002717091891	0.372839713673349

## Sheet: MT
Variables	%IncMSE	IncNodePurity
TempMax6	25.8775182197163	0.229156130403922
Temp6	23.359809606873	0.236927208482651
PrecPre8	22.1890095526127	0.234245705148956
Prec1	21.1455147873697	0.298458632887575
TempMin6	17.2954338333308	0.21532335596218
TempMax10	12.9638547694682	0.232008952794639
TempMinPre11	11.1410234511564	0.233789961668371
TempPre11	8.28307068426546	0.221672544160249
PrecPre1	3.13367851627979	0.195509392088092

## Sheet: PP
Variables	%IncMSE	IncNodePurity
TempMin5	24.7306278469623	1.77275383754575
TempMinPre6	24.2692190579809	1.48675043251956
TempPre10	20.4494973621402	1.64196279009064
TempMin10	20.087985676233	1.55008866696616
Temp5	19.8109403076899	1.60255770589271
TempMaxPre6	19.6670686629168	1.55638461557183
TempMax5	19.0286945855914	1.60666984671498
TempMaxPre10	18.1432994091333	1.47976309446862
TempMinPre10	17.9117692598209	1.55090184052053
TempMax10	17.292282204472	1.57103524129766
PrecPre5	14.2645022808596	1.74717014662398

## Sheet: LO
Variables	%IncMSE	IncNodePurity
TempMinPre12	31.332538677974	0.0942503532614893
Temp6	25.7946876376656	0.0915812886145151
TempMaxPre8	23.9188942790986	0.0994998790107349
PrecPre5	22.5300744557961	0.0898617224112165
PrecPre4	16.8212408356056	0.0836778018929595
PrecPre12	13.9216558193231	0.106115527366163

## Sheet: PO
Variables	%IncMSE	IncNodePurity
TempMinPre10	39.5687343782166	0.29224809886729
TempMaxPre10	37.5239413577402	0.287577624970854
Prec9	23.2416598916322	0.199156026043676
PrecPre10	21.8616442829233	0.227321463911828
TempMinPre7	20.2014906494247	0.227080080829608
TempMaxPre9	15.6269714671948	0.142220891435652
TempPre1	9.12145234214048	0.15577915808462
PrecPre5	8.02950333837072	0.157465060448724
Prec8	7.09241085738289	0.130971266092748

## Sheet: NO
Variables	%IncMSE	IncNodePurity
TempMaxPre6	21.7862039090306	0.0398619733061651
TempMinPre2	21.5978721487704	0.0440019065485928
TempPre2	20.3688731864634	0.0422707883072773
TempPre6	20.2815839562872	0.044414623885263
TempMinPre6	18.1867398178203	0.0437176379287903
TempMaxPre2	17.9103783126608	0.0451915534223844
TempMax9	14.8280681537576	0.0427059998178649
TempMinPre9	13.5955901354191	0.0392002888066924
PrecPre2	10.6353416188139	0.0500778967922352
TempMax4	8.80692676720849	0.0398273705982682
