# Supplementary material
Source: MDPI journal article supplement (https://www.mdpi.com/1999-4907/14/2/166)
Supplement: s1 [file s1 › Table S3.xlsx]

## Sheet: Appendix 4
Site	Model	Variables in the model	Estimated value	Std deviation	Sig	AIC	Corrected AIC	R2	RF Mean of squared residuals	RF % Variance explained
Composite population	Null model	-	-	-	-	-	349.084	-	-	-
	Model with variables resulted from final Random Forest regression	TempMin5	0.26549	0.04734	0.0000000725 **	318.53	318.988	0.181639	0.246533	30.19
		TempMax3	0.03641	0.05120	0.477863
		TempMax5	-0.06866	0.0471	0.146593
		TempMaxPre6	0.14126	0.05222	0.007459 **
	Final minimal adequate model after RF (with stepAIC ())	TempMin5	0.23618	0.03785	0.00000000282 ***	317.02	317.234	0.170972	-	-
		TempMaxPre6	0.11627	0.04309	0.0076 **
GM	Null model	-	-	-	-	-	27.6233	-	-	-
	Model with variables resulted from final Random Forest regression	Temp4	0.07033	0.07103	0.33117	16.631	21.2978	0.474326	0.0793044	34.42
		Temp10	-0.10040	0.05079	0.058761 .
		TempMin3	0.01304	0.06611	0.845173
		TempMax6	-0.27143	0.07634	0.001473 **
		TempMaxPre6	-0.27442	0.08589	0.003648 **
	Final minimal adequate model after RF (with stepAIC ())	TempMax6	-0.29387	0.07570	0.000551 ***	15.592	17.0735	0.386176	-	-
		TempMaxPre6	-0.22347	0.08351	0.012128 *
MT	Null model	-	-	-	-	-	14.2841	-	-
	Model with variables resulted from final Random Forest regression	Temp6	-0.890907	0.5980296	0.1479	12.209	15.569	0.260599	0.0560934	29.62
		TempMax6	0.7901249	0.587931	0.1902
		Prec1	0.0010507	0.0008965	0.2514
		PrecPre8	0.0019767	0.0012992	0.1398
	Final minimal adequate model after RF (with stepAIC ())	PrecPre8	0.002231	0.001076	0.0469 *	11.588	12.4448	0.125265	-	-
PP	Null model	-	-	-	-	-	81.2502	-	-	-
	Model with variables resulted from final Random Forest regression	TempMin5	0.58596	0.17870	0.00287 **	73.516	76.8763	0.380445	0.372169	42.4
		TempMin10	-0.05934	0.13496	0.66368
		TempPre10	0.09972	0.14025	0.48318
		TempMinPre6	0.48117	0.19827	0.02218 *
	Final minimal adequate model after RF (with stepAIC ())	TempMin5	0.6203	0.1688	0.00096 ***	70.255	71.7363	0.365979	-	-
		TempMinPre6	0.4827	0.1914	0.01739 *
LO	Null model	-	-	-	-	-	-8.90145	-		-
	Model with variables resulted from final Random Forest regression	Temp6	-0.0997530	0.0454660	0.0374 *	-11.074	-8.90145	0.307509	0.0257539	33.31
		TempMinPre12	0.0346229	0.0347319	0.328
		TempMaxPre8	0.0295283	0.0517635	0.5733
		PrecPre4	0.0005184	0.0004523	0.2622
		PrecPre5	-0.0006444	0.0004276	0.1439
	Final minimal adequate model after RF (with stepAIC ())	Temp6	-0.0882183	0.0421318	0.045126 *	-13.663	-12.1819	0.229625	-	-
		PrecPre5	-0.0008316	0.0004016	0.047401 *
PO	Null model	-	-	-	-	-	7.71602	-	-	-
	Model with variables resulted from final Random Forest regression	TempMinPre7	-0.1324307	0.0646749	0.0508 .	-4.3207	0.345973	0.491208	0.0335113	48.38
		TempMinPre10	0.1143813	0.176329	0.5222
		TempMaxPre10	0.0033369	0.1548189	0.9830
		Prec9	0.0003414	0.0004466	0.4515
		PrecPre10	0.0007020	0.0005190	0.1879
	Final minimal adequate model after RF (with stepAIC ())	TempMinPre7	-0.14009	0.06020	0.027139 *	-7.3785	-5.89698	0.442209	-	-
		TempMinPre10	0.12668	0.03364	0.000751 ***
NO	Null model	-	-	-	-	-	-37.0013	-	-	-
	Model with variables resulted from final Random Forest regression	TempPre2	-0.03793	0.11773	0.75	-43.302	-39.942	0.352066	0.0133329	16.92
		TempPre6	0.29808	0.1874	0.123
		TempMinPre2	-0.04124	0.12021	0.734
		TempMaxPre6	-0.22439	0.17156	0.202
	Final minimal adequate model after RF (with stepAIC ())	TempPre6	0.05826	0.02708	0.03989 *	-45.015	-43.5338	0.30407	-	-
		TempMinPre2	-0.06556	0.02123	0.00442 **
	Sig. Codes:	0.001 (***), 0.01 (**), 0.05 (*) and 0.1 (.)
